# Supplementary material
Source: PubMed Central journal article supplement (PMC2111636)
Supplement: annrheumd_ard.2007.069765_1.pdf [file annrheumd_ard.2007.069765_1.pdf]

Table 1. Patient characteristics in the QUEST-RA study per country.

| Country        | # sites | # patients | Female % | Non-Caucasians % | Age, mean | Education years mean | BMI, female mean | BMI, male mean | Disease Duration years mean | RF+ % | Extra-articular Disease* % |
|----------------|---------|------------|----------|------------------|-----------|----------------------|------------------|----------------|-----------------------------|-------|----------------------------|
| 1- Denmark     | 3       | 301        | 76.7     | 1.7              | 57.8      | 10.73                | 24.6             | 25.5           | 12.0                        | 73.7  | 33.9                       |
| 2- Finland     | 3       | 304        | 72.4     | 0.3              | 58.5      | 10.36                | 26.7             | 26.5           | 13.5                        | 75.1  | 17.8                       |
| 3- France      | 4       | 389        | 77.9     | 6.7              | 55.3      | 10.86                | 24.8             | 25.2           | 12.8                        | 75.3  | 20.6                       |
| 4- Germany     | 3       | 225        | 83.6     | 1.3              | 58.8      | 10.40                | 26.1             | 27.6           | 13.4                        | 61.4  | 35.6                       |
| 5- Ireland     | 3       | 225        | 64.3     | 3.1              | 56.7      | 11.59                | 25.3             | 25.5           | 11.5                        | 81.0  | 29.9                       |
| 6- Italy       | 4       | 336        | 78.2     | 0.9              | 61.0      | 8.34                 | 25.2             | 26.0           | 10.5                        | 72.7  | 13.0                       |
| 7- Netherlands | 3       | 317        | 66.2     | 4.1              | 59.2      | 11.26                | 26.0             | 25.2           | 9.2                         | 68.8  | 12.9                       |
| 8- Poland      | 7       | 642        | 86.7     | 0.6              | 53.2      | 12.02                | 25.4             | 25.3           | 11.5                        | 70.8  | 33.5                       |
| 9- Spain       | 3       | 301        | 74.3     | 2.0              | 59.9      | 10.38                | 26.3             | 26.8           | 10.8                        | 71.4  | 22.9                       |
| 10- Sweden     | 3       | 248        | 72.1     | 1.2              | 59.5      | 10.42                | 25.2             | 25.3           | 12.4                        | 82.0  | 22.6                       |
| 11- UK         | 3       | 126        | 77.8     | 16.7             | 60.2      | 12.71                | 24.7             | 25.8           | 15.5                        | 84.4  | 30.4                       |
| 12- Turkey     | 3       | 309        | 85.6     | 2.9              | 51.9      | 7.37                 | 27.3             | 26.4           | 11.6                        | 68.7  | 18.1                       |
| 13- Serbia     | 1       | 100        | 88.0     | 0                | 59.2      | 8.55                 | 25.9             | 24.6           | 10.1                        | 71.4  | 23.0                       |
| 14- USA        | 3       | 294        | 72.3     | 32.4             | 57.4      | 13.49                | 28.2             | 27.9           | 9.3                         | 69.9  | 24.1                       |
| 15- Argentina  | 2       | 246        | 90.2     | 93.9             | 51.4      | 9.42                 | 26.3             | 25.2           | 9.9                         | 90.5  | 26.5                       |
| Total          | 48      | 4363       | 78.0     | 9.8              | 56.8      | 10.66                | 25.9             | 26.0           | 11.5                        | 73.7  | 24.4                       |

\*\*includes nodules, pulmonal fibrosis, pericarditis, Felty's, scleritis

A supplemental file including standard deviations of variables provided.

Table 2. Median values of clinical variables in the QUEST-RA study per country.

| Country     | ESR  | SJC28 | TJC28 | LIM28 | MDGlobal | HAQ  | MDHAQ | Pain | Global | Fatigue | DAS28 | %am15* |
|-------------|------|-------|-------|-------|----------|------|-------|------|--------|---------|-------|--------|
| Denmark     | 14.0 | 1.0   | 2.0   | 0.0   | 1.3      | 0.63 | 0.50  | 2.6  | 2.8    | 3.6     | 3.3   | 56%    |
| Finland     | 13.0 | 1.0   | 1.0   | 0.0   | 0.9      | 0.63 | 0.50  | 2.8  | 2.8    | 2.6     | 3.1   | 66%    |
| France      | 16.0 | 1.0   | 2.0   | 1.0   | 2.5      | 0.88 | 0.60  | 3.9  | 3.6    | 4.2     | 3.6   | 60%    |
| Germany     | 20.0 | 3.0   | 4.0   | 0.0   | 3.0      | 0.75 | 0.60  | 5.0  | 4.9    | 4.6     | 4.3   | 56%    |
| Ireland     | 18.0 | 3.0   | 4.0   | 2.0   | 1.6      | 0.75 | 0.70  | 3.4  | 2.9    | 3.5     | 4.0   | 55%    |
| Italy       | 28.0 | 2.0   | 4.0   | 0.0   | 3.0      | 1.06 | 0.80  | 4.9  | 5.0    | 4.9     | 4.5   | 51%    |
| Netherlands | 15.0 | 1.0   | 0.0   | 1.0   | 0.6      | 0.75 | 0.60  | 2.5  | 2.7    | 3.1     | 3.0   | 49%    |
| Poland      | 31.0 | 6.0   | 9.0   | 3.0   | 4.3      | 1.38 | 1.20  | 5.0  | 4.8    | 5.2     | 5.3   | 78%    |
| Spain       | 17.0 | 1.0   | 1.0   | 0.0   | 1.2      | 0.88 | 0.72  | 3.2  | 3.6    | 3.7     | 3.5   | 47%    |
| Sweden      | 19.0 | 2.0   | 2.0   | 1.0   | 1.3      | 0.88 | 0.70  | 3.3  | 3.3    | 3.7     | 3.6   | 67%    |
| UK          | 21.0 | 1.0   | 4.0   | 0.0   | 2.0      | 0.88 | 0.70  | 4.2  | 3.8    | 5.1     | 4.2   | 65%    |
| Turkey      | 30.0 | 0.0   | 2.5   | 0.0   | 2.0      | 0.88 | 0.70  | 4.2  | 4.6    | 4.5     | 4.1   | 53%    |
| Serbia      | 28.0 | 6.0   | 18.0  | 2.0   | 4.6      | 1.63 | 1.40  | 5.1  | 5.3    | 5.5     | 6.1   | 71%    |
| USA         | 14.0 | 2.0   | 1.0   | 0.0   | 1.9      | 0.63 | 0.56  | 3.3  | 2.6    | 3.2     | 3.2   | 58%    |
| Argentina   | 30.0 | 9.0   | 10.5  | 2.0   | 4.6      | 1.00 | 0.90  | 5.0  | 4.7    | 6.3     | 5.6   | 64%    |
| Total       | 21.0 | 2.0   | 3.0   | 1.0   | 2.2      | 0.88 | 0.70  | 4.0  | 4.0    | 4.4     | 4.0   | 61%    |

\*percentage of patients who report morning stiffness 15 minutes or more

ESR=Erythrocyte sedimentation rate; SJC=Swollen joint count, TJC=Tender joint count, LIM=Limited motion/Deformity joint count, MDGlobal=Doctor global assessment of disease activity, HAQ= health assessment questionnaire, MDHAQ=Multi-dimensional HAQ, DAS28=Disease activity score on 28 joint count

A supplemental file including IQRs of variables provided.

Table 3. The use of disease-modifying anti rheumatic drugs (DMARDs) in the Quest-RA countries; highest percentage for each drug indicated in bold, lowest in bold italics.

| Country     | Delay to start DMARDs, months, median | DMARD Exposure Years, mean | Selected DMARDs ever taken; percentage of patients in the QUEST-RA study per country. |            |            |            |            |              |
|-------------|---------------------------------------|----------------------------|---------------------------------------------------------------------------------------|------------|------------|------------|------------|--------------|
|             |                                       |                            | Pred                                                                                  | MTX        | HCQ        | SSZ        | LEF        | Any Biologic |
| Denmark     | 10                                    | 7.9                        | 43%                                                                                   | 85%        | 39%        | 64%        | 11%        | 23%          |
| Finland     | 7                                     | 14.4                       | 74%                                                                                   | 85%        | <b>74%</b> | <b>84%</b> | 21%        | 17%          |
| France      | 8                                     | 9.9                        | 83%                                                                                   | 86%        | 55%        | 49%        | <b>42%</b> | <b>53%</b>   |
| Germany     | 15                                    | 8.4                        | 54%                                                                                   | 78%        | 30%        | 36%        | 25%        | 29%          |
| Ireland     | 11                                    | 6.3                        | 71%                                                                                   | <b>92%</b> | <b>15%</b> | 33%        | 24%        | 41%          |
| Italy       | 9                                     | 7.1                        | 69%                                                                                   | 79%        | 42%        | 14%        | 31%        | 26%          |
| Netherlands | 5                                     | 8.1                        | <b>26%</b>                                                                            | 91%        | 28%        | 35%        | 6%         | 19%          |
| Poland      | 4                                     | 7.2                        | 69%                                                                                   | 87%        | 34%        | 60%        | 18%        | 8%           |
| Spain       | 14                                    | 7.3                        | 67%                                                                                   | 82%        | 43%        | 29%        | 34%        | 27%          |
| Sweden      | 12                                    | 8.8                        | 66%                                                                                   | 83%        | 34%        | 62%        | 9%         | 31%          |
| UK          | 12                                    | 7.9                        | 51%                                                                                   | <b>67%</b> | 39%        | 46%        | <b>4%</b>  | 16%          |
| Turkey      | 12                                    | 8.9                        | 69%                                                                                   | 88%        | 27%        | 61%        | 22%        | 7%           |
| Serbia      | 11                                    | 6.6                        | <b>88%</b>                                                                            | 69%        | 55%        | 17%        | 7%         | <b>2%</b>    |
| USA         | 9                                     | 7.9                        | 77%                                                                                   | 85%        | 49%        | 12%        | 19%        | 33%          |
| Argentina   | 13                                    | 3.7                        | 83%                                                                                   | 68%        | 49%        | <b>6%</b>  | 16%        | 3%           |
| Total       | 9                                     | 8.1                        | 66%                                                                                   | 83%        | 41%        | 43%        | 21%        | 23%          |

Pred=prednisone, MTX=methotrexate, HCQ=hydroxychloroquine, SSZ=sulfasalazine, LEF=leflunomide

A supplemental file including standard deviation of DMARD exposure and IQR of delay to start DMARDs provided
